# Supplementary material for: Computational-observer analysis of illumination discrimination
Source: PubMed Central journal article supplement — J Vis. 2019 Jul 19;19(7):11. doi: 10.1167/19.7.11 (PMC6645618; doi:10.1167/19.7.11), 2019-07-19
Supplement: jovi-19-06-12_s02.pdf [file jovi-19-06-12_s02.pdf]

1           **Supplementary Table 1.** The table provides the mean number (taken across the  
2           1.1° by 1.1° image patches) of L, M and S cone isomerizations for each modeled  
3           experiment and illumination. The standard deviation (also across patches) is also  
4           provided. All isomerization numbers are computed using the 50 msec integration  
5           time employed in the paper and all include spontaneous isomerizations (dark  
6           noise) as well as stimulus-driven isomerizations.

| illumination | Exp1_L_mean | Exp1_L_SD | Exp1_M_mean | Exp1_M_SD | Exp1_S_mean | Exp1_S_SD | Exp2_L_mean | Exp2_L_SD | Exp2_M_mean | Exp2_M_SD | Exp2_S_mean | Exp2_S_SD |
|--------------|-------------|-----------|-------------|-----------|-------------|-----------|-------------|-----------|-------------|-----------|-------------|-----------|
| Standard     | 439.8       | 248.9     | 315.0       | 209.6     | 50.8        | 30.6      | 325.6       | 163.6     | 246.3       | 125.5     | 33.4        | 15.2      |
| Blue1        | 439.6       | 248.9     | 315.5       | 209.9     | 51.3        | 30.9      | 325.5       | 163.5     | 246.7       | 125.6     | 33.6        | 15.3      |
| Blue2        | 439.4       | 248.9     | 316.1       | 210.4     | 51.7        | 31.2      | 325.4       | 163.3     | 247.1       | 125.7     | 33.9        | 15.5      |
| Blue3        | 439.2       | 248.9     | 316.6       | 210.7     | 52.1        | 31.5      | 325.3       | 163.3     | 247.5       | 125.8     | 34.1        | 15.6      |
| Blue4        | 439.3       | 249.0     | 317.3       | 211.2     | 52.6        | 31.8      | 325.5       | 163.3     | 248.0       | 126.0     | 34.4        | 15.8      |
| Blue5        | 439.1       | 249.0     | 317.9       | 211.6     | 53.1        | 32.2      | 325.4       | 163.2     | 248.4       | 126.2     | 34.7        | 16.0      |
| Blue6        | 438.9       | 248.9     | 318.4       | 212.0     | 53.5        | 32.5      | 325.3       | 163.1     | 248.8       | 126.3     | 34.9        | 16.1      |
| Blue7        | 438.9       | 249.0     | 319.0       | 212.4     | 54.0        | 32.8      | 325.3       | 162.9     | 249.1       | 126.4     | 35.2        | 16.3      |
| Blue8        | 438.7       | 249.2     | 319.6       | 212.9     | 54.4        | 33.1      | 325.2       | 162.8     | 249.5       | 126.5     | 35.4        | 16.5      |
| Blue9        | 438.7       | 249.3     | 320.2       | 213.4     | 54.9        | 33.5      | 325.2       | 162.7     | 250.0       | 126.7     | 35.7        | 16.6      |
| Blue10       | 438.3       | 249.1     | 320.6       | 213.6     | 55.4        | 33.8      | 325.1       | 162.7     | 250.3       | 126.8     | 36.0        | 16.8      |
| Blue11       | 438.2       | 249.1     | 321.3       | 214.0     | 55.9        | 34.1      | 325.0       | 162.5     | 250.7       | 126.9     | 36.3        | 17.0      |
| Blue12       | 438.1       | 249.3     | 321.9       | 214.6     | 56.4        | 34.5      | 324.9       | 162.4     | 251.1       | 127.0     | 36.5        | 17.1      |
| Blue13       | 437.9       | 249.2     | 322.4       | 214.9     | 56.8        | 34.8      | 324.8       | 162.3     | 251.5       | 127.1     | 36.8        | 17.3      |
| Blue14       | 437.7       | 249.2     | 322.9       | 215.3     | 57.3        | 35.1      | 324.6       | 162.0     | 251.7       | 127.1     | 37.0        | 17.5      |
| Blue15       | 437.5       | 249.0     | 323.5       | 215.5     | 57.7        | 35.4      | 324.7       | 162.0     | 252.2       | 127.3     | 37.3        | 17.6      |
| Blue16       | 438.1       | 249.3     | 324.4       | 216.1     | 58.1        | 35.7      | 325.0       | 162.0     | 252.7       | 127.5     | 37.5        | 17.8      |
| Blue17       | 438.6       | 249.6     | 325.3       | 216.8     | 58.6        | 36.1      | 325.4       | 162.1     | 253.4       | 127.7     | 37.8        | 17.9      |
| Blue18       | 438.4       | 249.5     | 325.7       | 217.0     | 59.1        | 36.4      | 325.3       | 162.0     | 253.7       | 127.8     | 38.1        | 18.1      |
| Blue19       | 438.6       | 249.6     | 326.4       | 217.5     | 59.6        | 36.8      | 325.4       | 161.8     | 254.2       | 127.9     | 38.4        | 18.3      |
| Blue20       | 438.6       | 249.6     | 327.1       | 218.0     | 60.1        | 37.1      | 325.4       | 161.8     | 254.7       | 128.1     | 38.7        | 18.5      |
| Blue21       | 438.5       | 249.6     | 327.7       | 218.4     | 60.6        | 37.5      | 325.3       | 161.6     | 255.0       | 128.1     | 38.9        | 18.6      |
| Blue22       | 438.0       | 249.7     | 328.0       | 218.7     | 61.2        | 37.8      | 325.0       | 161.5     | 255.2       | 128.3     | 39.2        | 18.8      |
| Blue23       | 437.8       | 249.6     | 328.6       | 219.1     | 61.6        | 38.2      | 325.0       | 161.4     | 255.7       | 128.4     | 39.5        | 19.0      |
| Blue24       | 437.9       | 249.7     | 329.2       | 219.5     | 62.2        | 38.5      | 325.1       | 161.4     | 256.1       | 128.5     | 39.8        | 19.2      |
| Blue25       | 437.7       | 249.7     | 329.8       | 219.8     | 62.7        | 38.9      | 325.0       | 161.2     | 256.5       | 128.6     | 40.1        | 19.4      |
| Blue26       | 437.0       | 249.6     | 330.1       | 220.2     | 63.2        | 39.2      | 324.5       | 161.1     | 256.6       | 128.7     | 40.4        | 19.5      |
| Blue27       | 437.0       | 249.6     | 330.6       | 220.4     | 63.8        | 39.6      | 324.5       | 161.0     | 256.9       | 128.8     | 40.7        | 19.7      |
| Blue28       | 436.9       | 249.7     | 331.2       | 220.8     | 64.2        | 39.9      | 324.5       | 160.9     | 257.4       | 128.9     | 41.0        | 19.9      |
| Blue29       | 436.7       | 249.7     | 331.7       | 221.2     | 64.6        | 40.2      | 324.4       | 160.8     | 257.6       | 129.0     | 41.2        | 20.1      |
| Blue30       | 437.1       | 249.7     | 333.0       | 221.9     | 65.6        | 40.9      | 324.5       | 160.5     | 258.3       | 129.1     | 41.8        | 20.4      |
| Blue31       | 437.1       | 249.6     | 333.0       | 221.8     | 65.5        | 40.9      | 324.5       | 160.6     | 258.4       | 129.1     | 41.8        | 20.3      |
| Blue32       | 437.0       | 249.5     | 333.5       | 222.2     | 65.9        | 41.2      | 324.5       | 160.3     | 258.7       | 129.1     | 42.0        | 20.5      |
| Blue33       | 437.2       | 249.7     | 334.2       | 222.7     | 66.5        | 41.6      | 324.5       | 160.3     | 259.1       | 129.3     | 42.3        | 20.7      |
| Blue34       | 437.3       | 249.8     | 334.8       | 223.1     | 67.0        | 41.9      | 324.6       | 160.4     | 259.7       | 129.4     | 42.7        | 20.8      |
| Blue35       | 437.0       | 249.7     | 335.3       | 223.5     | 67.6        | 42.3      | 324.4       | 160.2     | 259.9       | 129.4     | 43.0        | 21.0      |
| Blue36       | 437.0       | 249.9     | 335.9       | 223.9     | 68.1        | 42.6      | 324.5       | 160.1     | 260.3       | 129.7     | 43.2        | 21.3      |
| Blue37       | 437.1       | 250.0     | 336.6       | 224.3     | 68.6        | 43.0      | 324.6       | 160.0     | 260.7       | 129.8     | 43.5        | 21.4      |
| Blue38       | 436.9       | 249.9     | 337.0       | 224.7     | 69.2        | 43.4      | 324.5       | 159.9     | 261.1       | 129.9     | 43.8        | 21.6      |
| Blue39       | 437.0       | 250.1     | 337.7       | 225.1     | 69.8        | 43.8      | 324.4       | 159.7     | 261.4       | 129.9     | 44.1        | 21.8      |
| Blue40       | 441.0       | 250.7     | 341.2       | 226.7     | 70.3        | 44.1      | 326.7       | 159.6     | 263.6       | 130.1     | 44.5        | 22.0      |
| Blue41       | 436.8       | 250.1     | 338.8       | 225.8     | 70.9        | 44.6      | 324.5       | 159.7     | 262.2       | 130.3     | 44.8        | 22.2      |
| Blue42       | 436.9       | 250.2     | 339.3       | 226.2     | 71.4        | 44.9      | 324.5       | 159.6     | 262.6       | 130.4     | 45.1        | 22.4      |
| Blue43       | 442.3       | 251.2     | 343.6       | 228.2     | 71.9        | 45.2      | 327.6       | 159.6     | 265.3       | 130.7     | 45.4        | 22.5      |
| Blue44       | 441.3       | 251.0     | 343.4       | 228.2     | 72.3        | 45.5      | 327.0       | 159.4     | 265.2       | 130.7     | 45.7        | 22.7      |
| Blue45       | 442.3       | 251.4     | 344.8       | 229.0     | 72.9        | 45.9      | 327.6       | 159.4     | 266.1       | 130.9     | 46.0        | 22.9      |
| Blue46       | 442.3       | 251.3     | 345.3       | 229.3     | 73.5        | 46.3      | 327.6       | 159.3     | 266.4       | 131.0     | 46.3        | 23.1      |
| Blue47       | 442.5       | 251.5     | 345.9       | 229.8     | 74.0        | 46.7      | 327.7       | 159.3     | 266.8       | 131.2     | 46.6        | 23.3      |
| Blue48       | 442.3       | 251.6     | 346.4       | 230.2     | 74.5        | 47.0      | 327.6       | 159.2     | 267.2       | 131.3     | 46.9        | 23.4      |
| Blue49       | 442.6       | 251.6     | 347.1       | 230.5     | 75.0        | 47.3      | 327.8       | 159.1     | 267.6       | 131.4     | 47.2        | 23.6      |
| Blue50       | 443.1       | 252.0     | 347.9       | 231.2     | 75.6        | 47.8      | 328.2       | 159.2     | 268.2       | 131.6     | 47.6        | 23.8      |
| Green1       | 439.4       | 249.5     | 316.1       | 210.8     | 49.9        | 29.9      | 325.9       | 164.0     | 247.6       | 126.3     | 32.9        | 14.8      |
| Green2       | 438.8       | 249.5     | 316.5       | 211.3     | 49.6        | 29.7      | 325.6       | 163.8     | 248.0       | 126.5     | 32.7        | 14.7      |
| Green3       | 438.2       | 249.5     | 316.7       | 211.7     | 49.3        | 29.5      | 325.5       | 163.8     | 248.3       | 126.7     | 32.6        | 14.6      |
| Green4       | 437.8       | 249.8     | 317.3       | 212.4     | 49.0        | 29.3      | 325.5       | 163.8     | 248.9       | 127.2     | 32.4        | 14.5      |
| Green5       | 437.9       | 249.9     | 317.8       | 212.9     | 48.7        | 29.1      | 325.7       | 163.9     | 249.5       | 127.5     | 32.2        | 14.4      |
| Green6       | 436.6       | 249.7     | 317.8       | 213.1     | 48.5        | 28.9      | 325.1       | 163.6     | 249.6       | 127.5     | 32.1        | 14.3      |
| Green7       | 436.3       | 249.7     | 318.5       | 213.6     | 48.1        | 28.7      | 325.0       | 163.6     | 250.2       | 127.8     | 31.9        | 14.2      |
| Green8       | 435.9       | 249.7     | 318.9       | 214.0     | 47.8        | 28.4      | 324.9       | 163.5     | 250.6       | 128.0     | 31.7        | 14.1      |
| Green9       | 435.7       | 249.8     | 319.4       | 214.6     | 47.5        | 28.2      | 325.0       | 163.5     | 251.2       | 128.3     | 31.6        | 14.0      |
| Green10      | 435.3       | 249.8     | 319.8       | 215.0     | 47.1        | 28.0      | 324.7       | 163.3     | 251.5       | 128.4     | 31.4        | 13.8      |
| Green11      | 435.2       | 249.9     | 320.4       | 215.5     | 46.9        | 27.8      | 324.9       | 163.3     | 252.1       | 128.7     | 31.2        | 13.7      |
| Green12      | 434.4       | 249.9     | 320.7       | 215.9     | 46.5        | 27.6      | 324.6       | 163.2     | 252.5       | 128.9     | 31.1        | 13.6      |
| Green13      | 433.7       | 249.9     | 320.9       | 216.3     | 46.2        | 27.4      | 324.4       | 163.1     | 252.8       | 129.1     | 30.9        | 13.5      |
| Green14      | 433.1       | 250.0     | 321.2       | 216.8     | 46.0        | 27.2      | 324.1       | 163.0     | 253.1       | 129.3     | 30.7        | 13.4      |
| Green15      | 432.5       | 249.9     | 321.5       | 217.1     | 45.7        | 26.9      | 323.9       | 163.0     | 253.5       | 129.6     | 30.6        | 13.3      |
| Green16      | 431.9       | 249.8     | 321.8       | 217.5     | 45.4        | 26.7      | 323.7       | 163.0     | 254.0       | 129.9     | 30.4        | 13.2      |
| Green17      | 431.9       | 250.1     | 322.5       | 218.1     | 45.1        | 26.5      | 323.9       | 163.0     | 254.5       | 130.2     | 30.3        | 13.1      |
| Green18      | 432.1       | 250.3     | 323.3       | 218.8     | 44.8        | 26.3      | 324.2       | 163.0     | 255.3       | 130.4     | 30.1        | 13.0      |
| Green19      | 431.2       | 250.2     | 323.3       | 219.1     | 44.6        | 26.1      | 323.7       | 162.7     | 255.4       | 130.5     | 30.0        | 12.9      |
| Green20      | 430.7       | 250.2     | 323.7       | 219.5     | 44.2        | 25.9      | 323.6       | 162.8     | 255.9       | 130.8     | 29.8        | 12.7      |
| Green21      | 430.2       | 250.2     | 324.0       | 219.9     | 44.0        | 25.7      | 323.6       | 162.7     | 256.3       | 131.1     | 29.7        | 12.7      |
| Green22      | 429.7       | 250.4     | 324.3       | 220.4     | 43.7        | 25.5      | 323.4       | 162.7     | 256.7       | 131.4     | 29.5        | 12.5      |
| Green23      | 429.5       | 250.3     | 324.2       | 220.3     | 43.6        | 25.5      | 323.3       | 162.6     | 256.6       | 131.3     | 29.5        | 12.5      |
| Green24      | 429.4       | 250.6     | 324.8       | 221.0     | 43.4        | 25.3      | 323.3       | 162.7     | 257.2       | 131.6     | 29.3        | 12.4      |
| Green25      | 428.8       | 250.4     | 325.0       | 221.2     | 43.0        | 25.0      | 323.2       | 162.6     | 257.5       | 131.8     | 29.2        | 12.3      |
| Green26      | 428.2       | 250.5     | 325.3       | 221.7     | 42.8        | 24.9      | 323.1       | 162.6     | 258.0       | 132.1     | 29.0        | 12.2      |
| Green27      | 427.7       | 250.6     | 325.6       | 222.1     | 42.5        | 24.7      | 322.9       | 162.5     | 258.3       | 132.3     | 28.9        | 12.1      |
| Green28      | 427.2       | 250.6     | 326.0       | 222.6     | 42.3        | 24.5      | 322.8       | 162.5     | 258.8       | 132.6     | 28.7        | 12.0      |
| Green29      | 426.9       | 250.8     | 326.5       | 223.2     | 42.0        | 24.3      | 322.7       | 162.4     | 259.3       | 132.9     | 28.6        | 11.9      |
| Green30      | 426.4       | 250.7     | 326.7       | 223.5     | 41.7        | 24.1      | 322.6       | 162.3     | 259.6       | 133.0     | 28.4        | 11.8      |
| Green31      | 425.9       | 250.8     | 327.1       | 224.0     | 41.4        | 23.9      | 322.5       | 162.3     | 260.1       | 133.3     | 28.3        | 11.7      |
| Green32      | 425.7       | 251.0     | 327.7       | 224.5     | 41.2        | 23.7      | 322.5       | 162.3     | 260.6       | 133.6     | 28.1        | 11.6      |
| Green33      | 425.3       | 251.0     | 328.0       | 224.9     | 40.8        | 23.4      | 322.4       | 162.3     | 261.0       | 133.8     | 28.0        | 11.5      |
| Green34      | 424.7       | 251.1     | 328.2       | 225.3     | 40.6        | 23.3      | 322.1       | 162.1     | 261.3       | 133.9     | 27.8        | 11.4      |
| Green35      | 424.4       | 251.2     | 328.8       | 225.9     | 40.3        | 23.1      | 322.1       | 162.2     | 261.9       | 134.3     | 27.7        | 11.3      |
| Green36      | 423.9       | 251.2     | 329.1       | 226.3     | 40.0        | 22.9      | 322.0       | 162.1     | 262.3       | 134.5     | 27.5        | 11.2      |
| Green37      | 422.5       | 250.8     | 328.8       | 226.3     | 40.1        | 22.9      | 321.2       | 161.7     | 262.1       | 134.5     | 27.6        | 11.2      |
| Green38      | 422.3       | 251.4     | 329.5       | 227.2     | 39.5        | 22.5      | 321.5       | 162.0     | 263.0       | 135.1     | 27.3        | 11.0      |
| Green39      | 422.0       | 251.9     | 330.2       | 228.1     | 39.0        | 22.1      | 321.9       | 162.4     | 264.0       | 135.8     | 27.0        | 10.8      |
| Green40      | 421.9       | 251.8     | 330.1       | 228.0     | 39.0        | 22.1      | 321.7       | 162.3     | 263.9       | 135.8     | 26.9        | 10.8      |
| Green41      | 421.6       | 251.9     | 330.5       | 228.4     | 38.7        | 21.8      | 321.7       | 162.3     | 264.4       | 136.1     | 26.8        | 10.6      |
| Green42      | 421.2       | 252.0     | 330.8       | 228.9     | 38.4        | 21.7      | 321.6       | 162.1     | 264.6       | 136.1     | 26.6        | 10.5      |
| Green43      | 421.2       | 252.2     | 331.5       | 229.4     | 38.1        | 21.4      | 321.9       | 162.4     | 265.4       | 136.6     | 26.5        | 10.4      |
| Green44      | 421.0       | 252.4     | 331.9       | 229.9     | 37.8        | 21.3      | 321.9       | 162.3     | 265.8       |           |             |           |

|          |       |       |       |       |      |      |       |       |       |       |      |      |
|----------|-------|-------|-------|-------|------|------|-------|-------|-------|-------|------|------|
| Green50  | 419.0 | 253.1 | 334.2 | 232.6 | 36.2 | 20.1 | 321.7 | 162.2 | 268.4 | 138.2 | 25.5 | 9.7  |
| Red1     | 441.3 | 249.6 | 315.2 | 209.7 | 50.9 | 30.6 | 326.6 | 164.2 | 246.5 | 125.6 | 33.4 | 15.2 |
| Red2     | 441.9 | 249.5 | 314.9 | 209.2 | 51.1 | 30.8 | 326.7 | 164.2 | 246.1 | 125.3 | 33.6 | 15.3 |
| Red3     | 442.3 | 249.4 | 314.7 | 208.7 | 51.5 | 31.0 | 326.7 | 164.1 | 245.7 | 125.0 | 33.8 | 15.4 |
| Red4     | 442.9 | 249.4 | 314.5 | 208.4 | 51.8 | 31.3 | 327.0 | 164.2 | 245.5 | 124.8 | 34.0 | 15.5 |
| Red5     | 443.5 | 249.4 | 314.1 | 207.9 | 52.1 | 31.5 | 327.1 | 164.3 | 245.0 | 124.6 | 34.1 | 15.6 |
| Red6     | 444.5 | 249.4 | 314.1 | 207.6 | 52.5 | 31.7 | 327.6 | 164.4 | 244.8 | 124.4 | 34.3 | 15.8 |
| Red7     | 444.9 | 249.5 | 313.7 | 207.2 | 52.8 | 32.0 | 327.7 | 164.5 | 244.4 | 124.1 | 34.5 | 15.9 |
| Red8     | 446.0 | 249.6 | 313.7 | 206.9 | 53.0 | 32.2 | 328.1 | 164.6 | 244.2 | 124.0 | 34.6 | 16.0 |
| Red9     | 446.4 | 249.5 | 313.2 | 206.4 | 53.3 | 32.4 | 328.2 | 164.6 | 243.7 | 123.6 | 34.8 | 16.1 |
| Red10    | 447.3 | 249.6 | 312.9 | 206.0 | 53.7 | 32.6 | 328.7 | 164.8 | 243.4 | 123.5 | 35.0 | 16.2 |
| Red11    | 447.9 | 249.7 | 312.5 | 205.6 | 54.0 | 32.9 | 328.8 | 164.9 | 243.0 | 123.3 | 35.2 | 16.3 |
| Red12    | 448.7 | 249.8 | 312.2 | 205.2 | 54.3 | 33.1 | 329.2 | 165.0 | 242.6 | 123.1 | 35.3 | 16.4 |
| Red13    | 449.6 | 249.9 | 311.8 | 204.8 | 54.7 | 33.3 | 329.5 | 165.2 | 242.2 | 122.9 | 35.5 | 16.6 |
| Red14    | 450.4 | 249.9 | 311.5 | 204.4 | 55.0 | 33.5 | 329.9 | 165.3 | 241.9 | 122.7 | 35.7 | 16.7 |
| Red15    | 451.2 | 250.0 | 311.2 | 204.0 | 55.3 | 33.8 | 330.2 | 165.5 | 241.6 | 122.5 | 35.9 | 16.8 |
| Red16    | 452.2 | 250.1 | 311.0 | 203.6 | 55.6 | 34.0 | 330.6 | 165.6 | 241.3 | 122.3 | 36.0 | 16.9 |
| Red17    | 453.3 | 250.3 | 310.8 | 203.3 | 56.0 | 34.2 | 331.1 | 165.8 | 240.9 | 122.1 | 36.2 | 17.0 |
| Red18    | 454.1 | 250.4 | 310.5 | 202.9 | 56.3 | 34.4 | 331.5 | 165.9 | 240.6 | 121.9 | 36.4 | 17.1 |
| Red19    | 454.8 | 250.4 | 310.1 | 202.4 | 56.6 | 34.7 | 331.7 | 166.0 | 240.2 | 121.6 | 36.6 | 17.3 |
| Red20    | 456.0 | 250.7 | 309.9 | 202.2 | 56.9 | 34.9 | 332.4 | 166.3 | 240.0 | 121.6 | 36.8 | 17.4 |
| Red21    | 456.9 | 250.8 | 309.7 | 201.8 | 57.3 | 35.1 | 332.7 | 166.4 | 239.7 | 121.3 | 37.0 | 17.5 |
| Red22    | 458.0 | 251.0 | 309.5 | 201.5 | 57.6 | 35.3 | 333.2 | 166.6 | 239.4 | 121.1 | 37.1 | 17.6 |
| Red23    | 459.2 | 251.1 | 309.4 | 201.1 | 57.9 | 35.6 | 333.8 | 166.7 | 239.2 | 120.9 | 37.3 | 17.7 |
| Red24    | 460.7 | 251.4 | 309.4 | 200.8 | 58.2 | 35.8 | 334.4 | 166.9 | 239.0 | 120.7 | 37.5 | 17.8 |
| Red25    | 461.9 | 251.5 | 309.3 | 200.5 | 58.4 | 36.0 | 335.1 | 167.1 | 238.8 | 120.5 | 37.6 | 17.9 |
| Red26    | 462.8 | 251.6 | 309.1 | 200.1 | 58.8 | 36.2 | 335.4 | 167.2 | 238.5 | 120.3 | 37.8 | 18.1 |
| Red27    | 463.7 | 251.8 | 308.8 | 199.7 | 59.1 | 36.5 | 335.8 | 167.4 | 238.1 | 120.1 | 38.0 | 18.2 |
| Red28    | 464.7 | 252.0 | 308.4 | 199.3 | 59.5 | 36.7 | 336.1 | 167.5 | 237.6 | 119.8 | 38.2 | 18.3 |
| Red29    | 465.8 | 252.2 | 308.1 | 198.9 | 59.8 | 37.0 | 336.7 | 167.8 | 237.3 | 119.6 | 38.4 | 18.4 |
| Red30    | 466.5 | 252.3 | 307.9 | 198.7 | 60.2 | 37.2 | 337.0 | 167.9 | 237.1 | 119.5 | 38.6 | 18.5 |
| Red31    | 467.4 | 252.4 | 307.4 | 198.1 | 60.5 | 37.4 | 337.4 | 168.1 | 236.6 | 119.2 | 38.7 | 18.7 |
| Red32    | 468.5 | 252.7 | 307.3 | 197.8 | 60.9 | 37.7 | 337.9 | 168.3 | 236.3 | 119.0 | 38.9 | 18.8 |
| Red33    | 468.8 | 252.5 | 306.7 | 197.2 | 61.2 | 37.9 | 337.8 | 168.4 | 235.9 | 118.8 | 39.2 | 18.9 |
| Red34    | 469.4 | 252.8 | 306.1 | 196.7 | 61.6 | 38.2 | 338.1 | 168.6 | 235.3 | 118.6 | 39.3 | 19.0 |
| Red35    | 470.3 | 253.0 | 305.9 | 196.4 | 61.9 | 38.4 | 338.6 | 168.8 | 235.0 | 118.4 | 39.5 | 19.2 |
| Red36    | 471.2 | 253.1 | 305.5 | 196.0 | 62.2 | 38.6 | 339.0 | 168.9 | 234.6 | 118.2 | 39.7 | 19.3 |
| Red37    | 472.4 | 253.4 | 305.5 | 195.7 | 62.6 | 38.9 | 339.6 | 169.2 | 234.5 | 118.0 | 39.9 | 19.4 |
| Red38    | 473.6 | 253.5 | 305.3 | 195.3 | 63.0 | 39.1 | 340.2 | 169.3 | 234.3 | 117.8 | 40.1 | 19.6 |
| Red39    | 475.1 | 253.8 | 305.2 | 194.9 | 63.3 | 39.4 | 340.8 | 169.5 | 234.0 | 117.6 | 40.3 | 19.7 |
| Red40    | 475.8 | 254.0 | 304.9 | 194.6 | 63.6 | 39.6 | 341.1 | 169.7 | 233.6 | 117.4 | 40.5 | 19.8 |
| Red41    | 477.1 | 254.2 | 304.8 | 194.3 | 64.0 | 39.8 | 341.8 | 169.9 | 233.5 | 117.2 | 40.7 | 19.9 |
| Red42    | 477.8 | 254.3 | 304.3 | 193.7 | 64.3 | 40.0 | 342.0 | 170.0 | 232.9 | 116.9 | 40.9 | 20.0 |
| Red43    | 479.0 | 254.7 | 304.2 | 193.6 | 64.8 | 40.4 | 342.6 | 170.3 | 232.8 | 116.8 | 41.1 | 20.2 |
| Red44    | 480.1 | 254.9 | 303.9 | 193.1 | 65.1 | 40.6 | 343.1 | 170.5 | 232.4 | 116.5 | 41.3 | 20.3 |
| Red45    | 481.1 | 255.1 | 303.7 | 192.8 | 65.5 | 40.8 | 343.6 | 170.7 | 232.2 | 116.4 | 41.5 | 20.5 |
| Red46    | 482.0 | 255.2 | 303.2 | 192.2 | 65.8 | 41.1 | 344.0 | 170.8 | 231.7 | 116.1 | 41.7 | 20.6 |
| Red47    | 483.0 | 255.6 | 303.0 | 191.9 | 66.1 | 41.3 | 344.4 | 171.0 | 231.3 | 115.9 | 41.9 | 20.7 |
| Red48    | 484.0 | 255.7 | 302.7 | 191.4 | 66.6 | 41.6 | 344.9 | 171.2 | 231.0 | 115.7 | 42.1 | 20.8 |
| Red49    | 483.9 | 255.8 | 302.6 | 191.5 | 66.5 | 41.6 | 344.8 | 171.2 | 231.0 | 115.7 | 42.1 | 20.8 |
| Red50    | 485.8 | 256.1 | 302.1 | 190.7 | 67.3 | 42.1 | 345.6 | 171.5 | 230.4 | 115.3 | 42.5 | 21.1 |
| Yellow1  | 440.2 | 249.0 | 314.0 | 208.9 | 50.0 | 30.0 | 325.8 | 163.8 | 245.6 | 125.2 | 32.9 | 14.9 |
| Yellow2  | 440.6 | 249.0 | 313.5 | 208.5 | 49.5 | 29.7 | 326.0 | 164.1 | 245.3 | 125.2 | 32.7 | 14.7 |
| Yellow3  | 440.5 | 248.8 | 312.7 | 207.9 | 49.1 | 29.4 | 325.9 | 164.0 | 244.8 | 125.0 | 32.4 | 14.5 |
| Yellow4  | 440.6 | 248.9 | 312.1 | 207.6 | 48.6 | 29.0 | 325.9 | 164.2 | 244.3 | 124.8 | 32.1 | 14.4 |
| Yellow5  | 440.9 | 248.9 | 311.5 | 207.0 | 48.2 | 28.7 | 326.0 | 164.2 | 243.9 | 124.6 | 31.9 | 14.2 |
| Yellow6  | 441.2 | 248.9 | 311.1 | 206.7 | 47.8 | 28.4 | 326.1 | 164.4 | 243.5 | 124.5 | 31.7 | 14.1 |
| Yellow7  | 440.8 | 248.6 | 310.4 | 206.1 | 47.3 | 28.1 | 325.8 | 164.4 | 243.0 | 124.3 | 31.4 | 13.9 |
| Yellow8  | 441.1 | 248.7 | 309.8 | 205.7 | 46.9 | 27.8 | 325.9 | 164.4 | 242.6 | 124.1 | 31.2 | 13.8 |
| Yellow9  | 441.2 | 248.6 | 309.1 | 205.2 | 46.5 | 27.5 | 325.9 | 164.5 | 242.1 | 123.9 | 31.0 | 13.6 |
| Yellow10 | 441.5 | 248.7 | 308.6 | 204.9 | 46.0 | 27.2 | 326.1 | 164.7 | 241.8 | 123.9 | 30.7 | 13.5 |
| Yellow11 | 441.8 | 248.7 | 308.1 | 204.4 | 45.6 | 26.9 | 326.1 | 164.7 | 241.3 | 123.7 | 30.5 | 13.3 |
| Yellow12 | 441.9 | 248.6 | 307.5 | 204.0 | 45.2 | 26.6 | 326.3 | 164.9 | 241.0 | 123.6 | 30.3 | 13.2 |
| Yellow13 | 442.1 | 248.6 | 306.9 | 203.6 | 44.8 | 26.3 | 326.4 | 165.1 | 240.6 | 123.5 | 30.1 | 13.0 |
| Yellow14 | 442.5 | 248.7 | 306.4 | 203.2 | 44.4 | 26.0 | 326.5 | 165.2 | 240.1 | 123.3 | 29.8 | 12.8 |
| Yellow15 | 442.4 | 248.6 | 305.7 | 202.7 | 44.0 | 25.8 | 326.4 | 165.2 | 239.6 | 123.1 | 29.6 | 12.7 |
| Yellow16 | 442.6 | 248.5 | 305.0 | 202.2 | 43.6 | 25.4 | 326.4 | 165.2 | 239.1 | 122.9 | 29.4 | 12.6 |
| Yellow17 | 442.9 | 248.6 | 304.5 | 201.8 | 43.2 | 25.2 | 326.6 | 165.5 | 238.8 | 122.9 | 29.1 | 12.4 |
| Yellow18 | 443.1 | 248.5 | 303.9 | 201.3 | 42.8 | 24.9 | 326.6 | 165.5 | 238.3 | 122.6 | 28.9 | 12.3 |
| Yellow19 | 443.0 | 248.4 | 303.9 | 201.2 | 42.8 | 24.9 | 326.6 | 165.5 | 238.3 | 122.7 | 28.9 | 12.2 |
| Yellow20 | 443.6 | 248.5 | 302.7 | 200.3 | 42.0 | 24.3 | 326.9 | 165.7 | 237.5 | 122.3 | 28.5 | 12.0 |
| Yellow21 | 444.0 | 248.5 | 302.2 | 200.0 | 41.6 | 24.0 | 327.0 | 165.9 | 237.1 | 122.2 | 28.3 | 11.8 |
| Yellow22 | 444.4 | 248.6 | 301.6 | 199.6 | 41.2 | 23.7 | 327.2 | 166.0 | 236.7 | 122.0 | 28.0 | 11.6 |
| Yellow23 | 444.8 | 248.6 | 301.0 | 199.0 | 40.8 | 23.4 | 327.3 | 166.2 | 236.2 | 121.9 | 27.8 | 11.5 |
| Yellow24 | 445.1 | 248.7 | 300.5 | 198.7 | 40.5 | 23.2 | 327.5 | 166.4 | 235.9 | 121.8 | 27.6 | 11.4 |
| Yellow25 | 445.2 | 248.6 | 299.8 | 198.2 | 40.1 | 22.9 | 327.5 | 166.4 | 235.4 | 121.6 | 27.4 | 11.2 |
| Yellow26 | 445.6 | 248.6 | 299.2 | 197.7 | 39.7 | 22.6 | 327.7 | 166.5 | 235.0 | 121.4 | 27.2 | 11.1 |
| Yellow27 | 445.8 | 248.5 | 298.4 | 197.1 | 39.3 | 22.3 | 327.7 | 166.6 | 234.4 | 121.2 | 27.0 | 10.9 |
| Yellow28 | 446.4 | 248.7 | 297.9 | 196.8 | 39.0 | 22.1 | 328.0 | 166.8 | 234.0 | 121.1 | 26.8 | 10.8 |
| Yellow29 | 446.7 | 248.7 | 297.3 | 196.3 | 38.6 | 21.8 | 328.2 | 167.0 | 233.6 | 121.0 | 26.6 | 10.7 |
| Yellow30 | 447.2 | 248.9 | 296.7 | 195.9 | 38.2 | 21.5 | 328.5 | 167.2 | 233.2 | 120.9 | 26.4 | 10.5 |
| Yellow31 | 447.3 | 248.9 | 296.0 | 195.4 | 37.8 | 21.2 | 328.4 | 167.4 | 232.7 | 120.7 | 26.2 | 10.3 |
| Yellow32 | 447.7 | 248.8 | 295.4 | 194.9 | 37.5 | 21.0 | 328.7 | 167.4 | 232.2 | 120.5 | 26.0 | 10.3 |
| Yellow33 | 448.2 | 248.9 | 294.8 | 194.4 | 37.2 | 20.7 | 328.9 | 167.6 | 231.8 | 120.4 | 25.8 | 10.1 |
| Yellow34 | 448.7 | 249.1 | 294.1 | 194.0 | 36.8 | 20.4 | 329.2 | 167.8 | 231.3 | 120.3 | 25.6 | 10.0 |
| Yellow35 | 448.9 | 249.1 | 293.4 | 193.5 | 36.5 | 20.2 | 329.3 | 168.0 | 230.9 | 120.1 | 25.4 | 9.8  |
| Yellow36 | 449.3 | 249.1 | 292.7 | 192.9 | 36.1 | 19.9 | 329.4 | 168.2 | 230.3 | 120.0 | 25.3 | 9.7  |
| Yellow37 | 449.6 | 249.2 | 292.0 | 192.5 | 35.8 | 19.7 | 329.5 | 168.3 | 229.8 | 119.8 | 25.1 | 9.6  |
| Yellow38 | 449.8 | 249.1 | 291.3 | 191.9 | 35.4 | 19.4 | 329.7 | 168.4 | 229.3 | 119.6 | 24.9 | 9.5  |
| Yellow39 | 450.3 | 249.2 | 290.8 | 191.5 | 35.1 | 19.2 | 329.7 | 168.6 | 228.9 | 119.4 | 24.7 | 9.3  |
| Yellow40 | 450.8 | 249.3 | 290.2 | 191.0 | 34.8 | 19.0 | 330.0 | 168.7 | 228.5 | 119.2 | 24.5 | 9.2  |
| Yellow41 | 450.8 | 249.2 | 289.4 | 190.4 | 34.5 | 18.7 | 330.0 | 168.8 | 227.9 | 119.1 | 24.4 | 9.1  |
| Yellow42 | 451.3 | 249.3 | 288.8 | 190.0 | 34.1 | 18.5 | 330.3 | 169.1 | 227.5 | 119.0 | 24.2 | 8.9  |
| Yellow43 | 451.6 | 249.3 | 288.0 | 189.4 | 33.8 | 18.2 | 330.4 | 169.2 | 226.9 | 118.7 | 24.0 | 8.8  |
| Yellow44 | 452.1 | 249.4 | 287.4 | 188.9 | 33.4 | 18.0 | 330.5 | 169.3 | 226.3 | 118.5 | 23.8 | 8.7  |
| Yellow45 | 452.6 | 249.4 | 286.7 | 188.4 | 33.2 | 17.8 | 330.9 | 169.5 | 225.9 | 118.4 | 23.7 | 8    |
